# Supplementary material for: Characterization of Metabolic Correlations of Ursodeoxycholic Acid with Other Bile Acid Species through In Vitro Sequential Metabolism and Isomer-Focused Identification
Source: MDPI journal article supplement (doi:10.3390/molecules28124801), 2023-06-16
Supplement: s1 [file s1]

## Supplemental information

# Characterization of Metabolic Correlations of Ursodeoxycholic Acid with Other Bile Acid Species through In Vitro Sequential Metabolism and Isomer-Focused Identification

Wei Li <sup>1</sup>, Wei Chen <sup>1</sup>, Xiaoya Niu <sup>1</sup>, Chen Zhao <sup>2</sup>, Pengfei Tu <sup>1</sup>, Jun Li <sup>1</sup>, Wenjing Liu <sup>3,\*</sup> and Yuelin Song <sup>1,\*</sup>

<sup>1</sup> Modern Research Center for Traditional Chinese Medicine, Beijing Research Institute of Chinese Medicine, Beijing University of Chinese Medicine, Beijing 100029, China; lw160221071@163.com (W.L.)

<sup>2</sup> Zhangzhou Pien Tze Huang Pharmaceutical Co., Ltd., Zhangzhou 363000, China

<sup>3</sup> School of Pharmacy, Henan University of Chinese Medicine, Zhengzhou 450046, China

\* Correspondence: liuwj107@163.com (W.L.); syltwc2005@163.com (Y.S.)

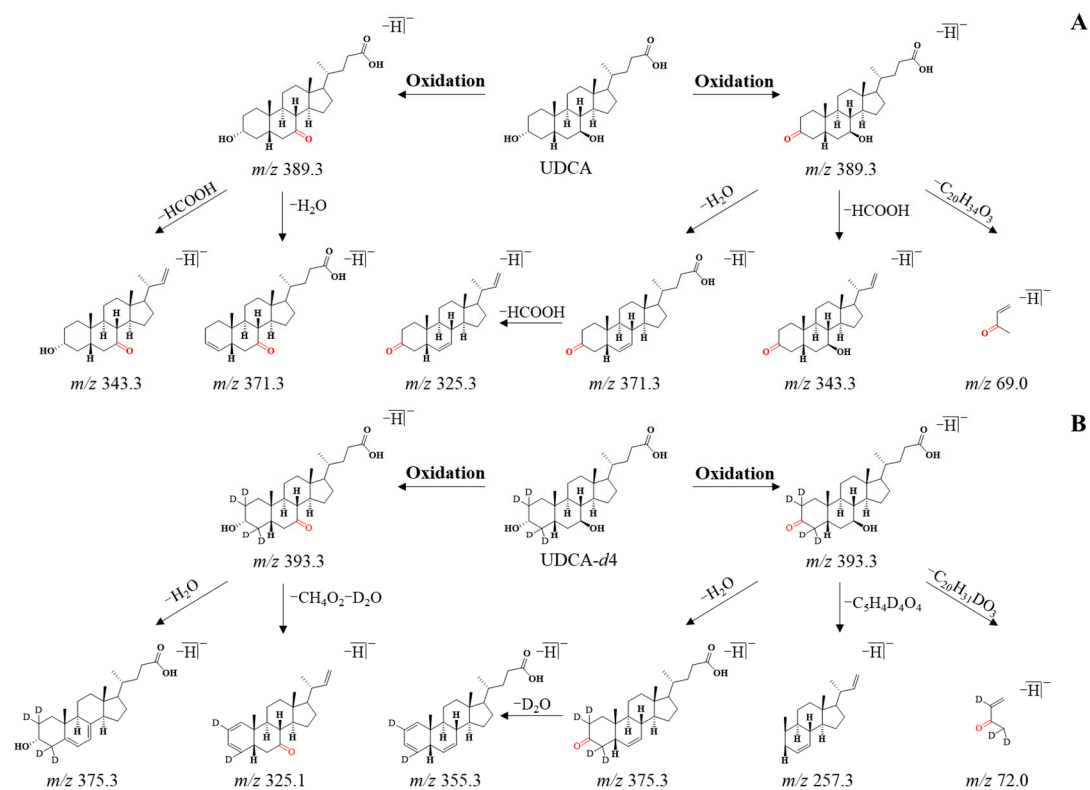

**Figure S1.** LC–MS chromatogram and proposed fragmentation pathways of oxidative products in the negative ion mode. (A) Proposed fragmentation pathways of 7 $\beta$ -hydroxy-3-oxo-5 $\beta$ -cholan-24-oic acid and 7-ketolithocholic acid. (B) Proposed fragmentation pathways of 7 $\beta$ -hydroxy-3-oxo-5 $\beta$ -cholan-24-oic acid- and 7-ketolithocholic acid- $d_4$ .

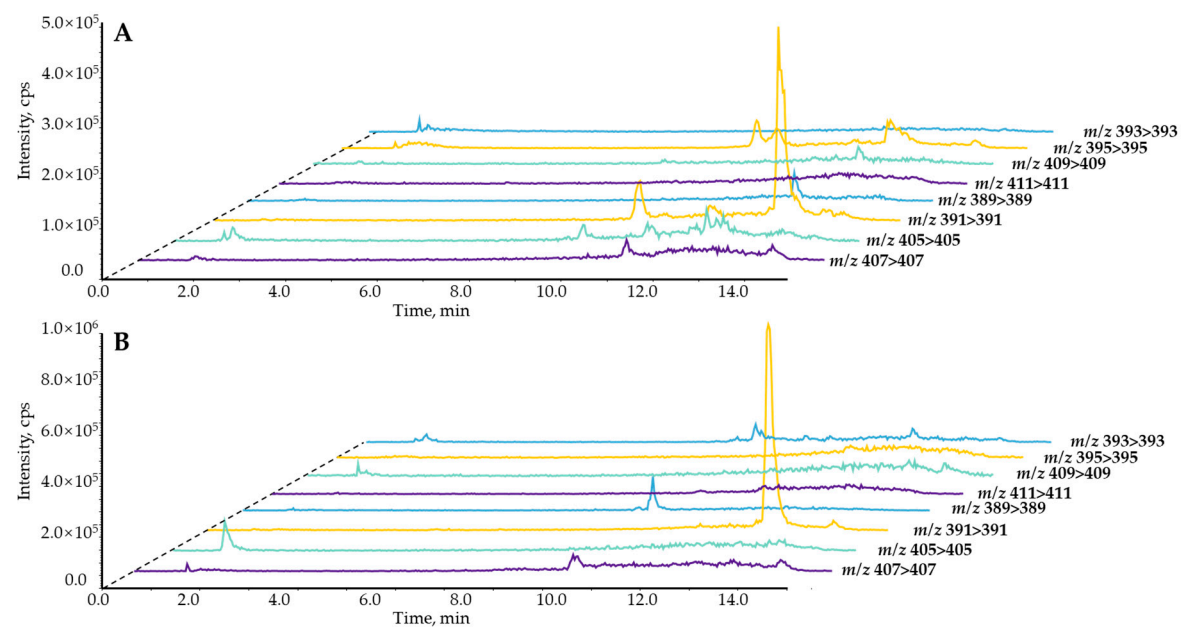

**Figure S2.** Extraction chromatography of incubation system from the LC-pMRM program (A) without UDCA and with NADPH incubation system involved HLM; (B) without UDCA and NADPH incubation system, with HLM.

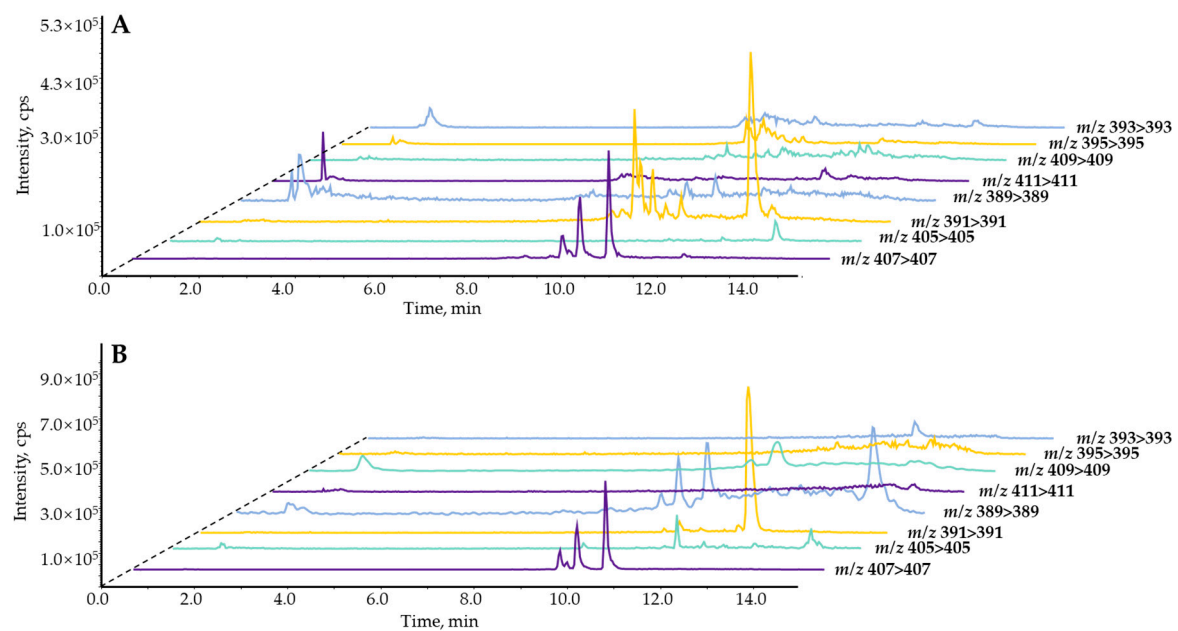

**Figure S3.** Extraction chromatography of incubation system from the LC-pMRM program (A) without UDCA and with NADPH incubation system involved MLM; (B) without UDCA and NADPH incubation system, with MLM.

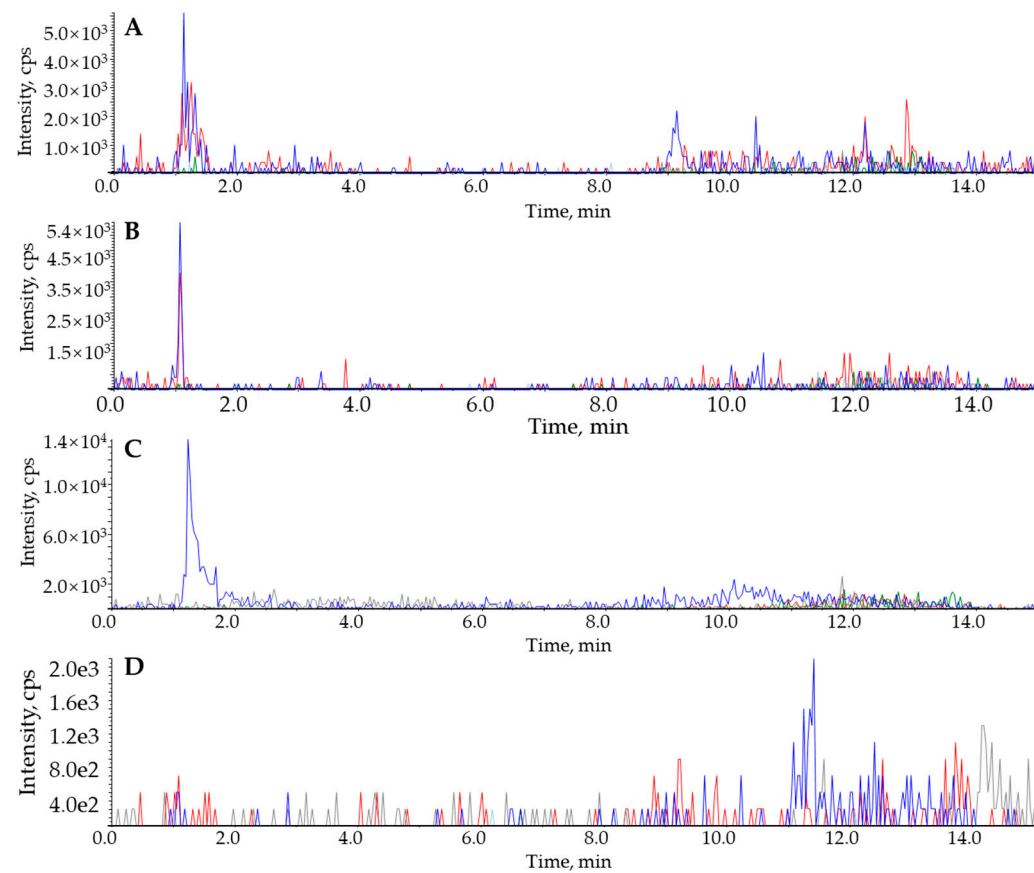

**Figure S4.** Extraction chromatography of incubation system from the LC-*p*MRM program (A) without UDCA and with UDPGA incubation system involved HLM or MLM; (B) without UDCA and UDPGA incubation system, with HLM or MLM; (C) without UDCA and with PAPS incubation system involved HLM; (D) without UDCA and PAPS incubation system, with HLM or MLM.

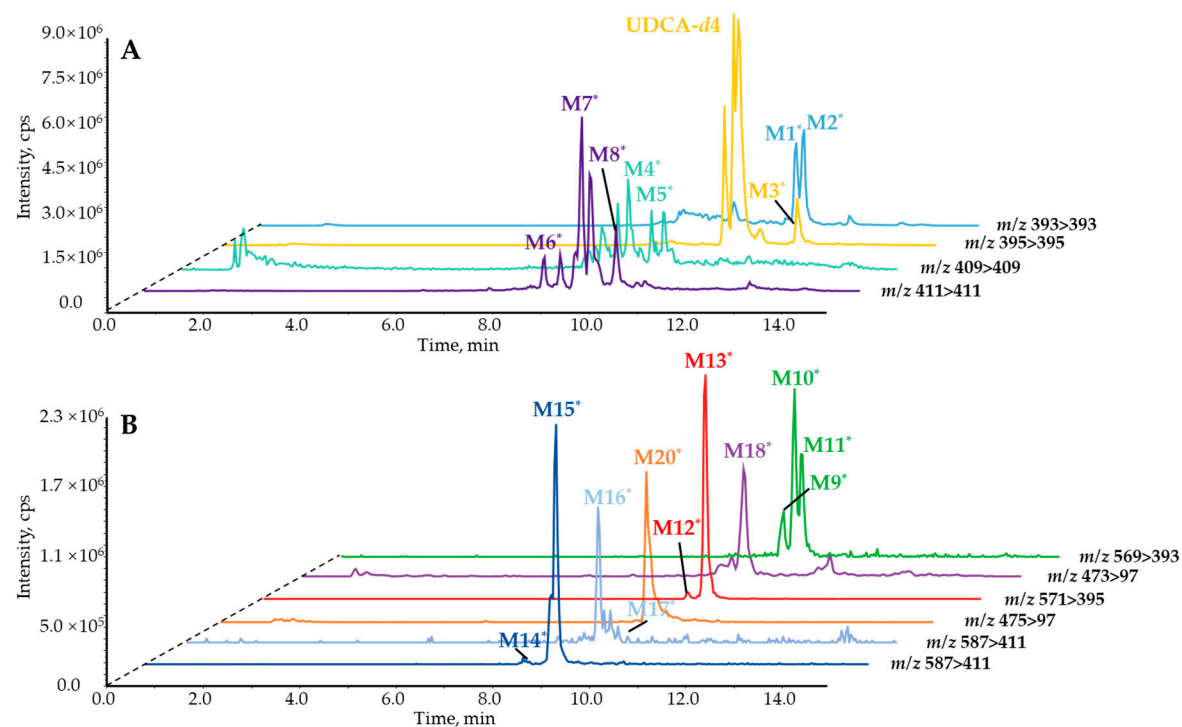

**Figure S5.** (A) Extracted ion current chromatogram (phase I metabolites of UDCA-*d*<sub>4</sub>) from the LC-*p*MRM program; (B) Extracted ion current chromatogram (phase II glucuronidated and sulfated metabolites of UDCA-*d*<sub>4</sub>) from the LC-*p*MRM program.

**Table S1** The chromatographic, MS/MS information, optimized ion transitions and collision energy information of UDCA *in vitro* metabolites generated from incubation of liver microsomes (human and mouse) by *p*MRM program.

| Metabolite                     | <i>t<sub>R</sub></i><br>(min) | Q1<br>(Da) | Q3<br>(Da) | OCE<br>(eV) | DP<br>(V) | MS <sup>1</sup> (Da) | MS <sup>2</sup> (Da)                    | AF2 level corresponding to 50%<br>relative intensity | Compound name                                                                                          | Incubation<br>system |
|--------------------------------|-------------------------------|------------|------------|-------------|-----------|----------------------|-----------------------------------------|------------------------------------------------------|--------------------------------------------------------------------------------------------------------|----------------------|
| <b>M1</b>                      | 10.99                         | 389.3      | 389.3      | -22.8       | -100      | –                    | –                                       | <i>m/z</i> 389.3>389.3>389.3(0.01802V)               | 7β-hydroxy-3-oxo-5β-<br>cholan-24-oic acid                                                             | HLM & MLM            |
|                                | 8.66                          | –          | –          | –           | –         | 389.2705             | 371.2637,343.2656,325.2553,69.03<br>46  |                                                      |                                                                                                        | MLM                  |
| <b>M1-<i>d</i><sub>4</sub></b> | 8.63                          | 393.3      | 393.3      | -22.8       | -100      | 393.2952             | 375.2863,355.2267,257.1544,72.05<br>35  | –                                                    | 7β-hydroxy-3-oxo-5β-<br>cholan-24-oic acid- <i>d</i> <sub>4</sub>                                      | HLM & MLM            |
| <b>M2</b>                      | 11.25                         | 389.3      | 389.3      | -22.3       | -100      | –                    | –                                       | <i>m/z</i> 389.3>389.3>389.3(0.02379V)               | 7-ketolithocholic acid*                                                                                | HLM & MLM            |
|                                | 8.78                          | –          | –          | –           | –         | 389.2705             | 371.2610,343.2649                       |                                                      |                                                                                                        | MLM                  |
| <b>M2-<i>d</i><sub>4</sub></b> | 8.79                          | 393.3      | 393.3      | -22.3       | -100      | 393.2954             | 375.2910,325.1848                       | –                                                    | 7-ketolithocholic acid- <i>d</i> <sub>4</sub>                                                          | HLM & MLM            |
| <b>M3</b>                      | 12.00                         | 391.3      | 391.3      | -20.1       | -100      | –                    | –                                       | <i>m/z</i> 391.3>391.3>391.3(0.02077V)               | Chenodeoxycholic acid*                                                                                 | HLM & MLM            |
|                                | 8.34                          | –          | –          | –           | –         | 391.286              | 373.2764,345.7297                       |                                                      |                                                                                                        |                      |
| <b>M3-<i>d</i><sub>4</sub></b> | 9.53                          | 395.3      | 395.3      | -20.1       | -100      | 395.3117             | 377.3023                                | –                                                    | Chenodeoxycholic acid- <i>d</i> <sub>4</sub>                                                           | HLM & MLM            |
|                                | 9.40                          | 405.3      | 405.3      | -16.79      | -100      | –                    | –                                       |                                                      | 3α,7β-dihydroxy-6-oxo-5β-<br>cholan-24-oic acid or 3α,6β-<br>Dihydroxy-7-oxo-5β-<br>cholan-24-oic acid | HLM & MLM<br>HLM     |
| <b>M4</b>                      | 7.69                          | –          | –          | –           | –         | 405.2659             | 387.2552,375.2551,369.2458,357.2<br>482 | –                                                    |                                                                                                        |                      |
| <b>M5</b>                      | 10.12                         | 405.3      | 405.3      | -20.67      | -100      | –                    | –                                       | –                                                    | 3α,7β-dihydroxy-12-oxo-<br>5β-cholan-24-oic acid                                                       | HLM & MLM<br>MLM     |
|                                | 7.98                          | –          | –          | –           | –         | 405.2659             | 387.2559,353.2128,69.0345               |                                                      |                                                                                                        |                      |
| <b>M5-<i>d</i><sub>4</sub></b> | 7.94                          | 409.3      | 409.3      | -20.67      | -100      | 409.2907             | 391.2817                                | –                                                    | 3α,7α-dihydroxy-12-oxo-<br>5β-cholan-24-oic acid - <i>d</i> <sub>4</sub>                               | MLM                  |
| <b>M6</b>                      | 8.30                          | 407.3      | 407.3      | -21.02      | -100      | –                    | –                                       | <i>m/z</i> 407.3>407.3>407.3(0.02594V)               | 3β,7β,12α-trihydroxy-5β-                                                                               | HLM                  |

|                                 |      |       |       |        |      |          |                                     |                                        |                                                                      |           |
|---------------------------------|------|-------|-------|--------|------|----------|-------------------------------------|----------------------------------------|----------------------------------------------------------------------|-----------|
|                                 | 6.60 | –     | –     | –      | –    | 407.2815 | 389.2744,371.2604                   |                                        | cholan-24-oic acid                                                   |           |
| <b>M6-<i>d</i><sub>4</sub></b>  | 6.58 | 411.3 | 411.3 | –21.02 | –100 | 411.3063 | 375.2857,365.3013,69.0346           | –                                      | 3β,7β,12α-trihydroxy-5β-cholan-24-oic acid- <i>d</i> <sup>4</sup>    | HLM       |
| <b>M7</b>                       | 9.11 | 407.3 | 407.3 | –18.1  | –100 | –        | –                                   | <i>m/z</i> 407.3>407.3>407.3(0.03270V) | Ursocholic acid *                                                    | HLM & MLM |
|                                 | 6.70 | –     | –     | –      | –    | 407.2813 | 391.2476,345.2444,271.2069          |                                        |                                                                      | HLM       |
| <b>M7-<i>d</i><sub>4</sub></b>  | 6.70 | 411.3 | 411.3 | –18.1  | –100 | 411.3065 | 395.2760,349.2695                   | –                                      | Ursocholic acid- <i>d</i> <sub>4</sub>                               | MLM       |
| <b>M8</b>                       | 9.86 | 407.3 | 407.3 | –22.3  | –100 | –        | –                                   | <i>m/z</i> 407.3>407.3>407.3(0.03836V) | β-muricholic acid *                                                  | HLM & MLM |
|                                 | 7.40 | –     | –     | –      | –    | 407.2812 | 371.2602,331.2287,69.0347           |                                        |                                                                      | MLM       |
| <b>M8-<i>d</i><sub>4</sub></b>  | 7.37 | 411.3 | 411.3 | –22.3  | –100 | 411.3063 | 393.2951,365.1661,349.2690          | –                                      | β-Muricholic acid- <i>d</i> <sub>4</sub>                             | MLM       |
| <b>M9</b>                       | 9.16 | 565.3 | 389.3 | –47.68 | –100 | –        | –                                   | <i>m/z</i> 565.3>389.3>389.3(0.02630V) | 7β-hydroxy-3-oxo-5β-cholan-24-oic acid-7- <i>O</i> -glucuronide      | HLM & MLM |
| <b>M10</b>                      | 9.37 | 565.3 | 389.3 | –48.38 | –100 | –        | –                                   | <i>m/z</i> 565.3>389.3>389.3(0.02491V) | 7β-hydroxy-3-oxo-5β-cholan-24-oic acid-24- <i>O</i> -glucuronide     | HLM & MLM |
| <b>M11</b>                      | 9.52 | 565.3 | 389.3 | –49.74 | –100 | –        | –                                   | <i>m/z</i> 565.3>389.3>389.3(0.01962V) | 7-ketolithocholic acid-24- <i>O</i> -glucuronide                     | HLM & MLM |
| <b>M12</b>                      | 8.83 | 567.3 | 391.3 | –49.96 | –100 | –        | –                                   | <i>m/z</i> 567.3>391.3>391.3(0.02576V) | Ursodeoxycholic acid-7- <i>O</i> -glucuronide                        | HLM & MLM |
| <b>M13</b>                      | 9.16 | 567.3 | 391.3 | –51.5  | –100 | –        | –                                   |                                        | Ursodeoxycholic acid-3- <i>O</i> -glucuronide                        | HLM & MLM |
|                                 | 6.65 | –     | –     | –      | –    | 567.3202 | 391.2863,175.0256,129.0200,113.0250 | <i>m/z</i> 567.3>391.3>391.3(0.03289V) |                                                                      | MLM       |
| <b>M13-<i>d</i><sub>4</sub></b> | 6.62 | 571.3 | 395.3 | –51.5  | –100 | 571.345  | 395.3119,175.0255,133.0149,113.0250 | –                                      | Ursodeoxycholic acid-3- <i>O</i> -glucuronide- <i>d</i> <sub>4</sub> | MLM       |
| <b>M14</b>                      | 7.78 | 583.3 | 407.3 | –50.57 | –100 | –        | –                                   | <i>m/z</i> 583.3>407.3>407.3(0.03090V) | Ursocholic acid-7- <i>O</i> -glucuronide                             | MLM       |



|                            |      |       |       |        |      |          |                                     |                                        |                          |                                 |           |
|----------------------------|------|-------|-------|--------|------|----------|-------------------------------------|----------------------------------------|--------------------------|---------------------------------|-----------|
|                            |      |       |       |        |      |          |                                     |                                        | glucuronide              |                                 |           |
| M15                        | 8.44 | 583.3 | 407.3 | −51.33 | −100 | −        | −                                   | <i>m/z</i> 583.3>407.3>407.3(0.03688V) | β-Muricholic             | acid-3- <i>O</i> -              | MLM       |
|                            | 6.00 | 583.3 | 407.3 | −51.33 | −100 | 583.3144 | 407.2813,175.0255,129.0201,113.0250 |                                        | glucuronide              |                                 |           |
| M16                        | 8.62 | 583.3 | 407.3 | −53.74 | −100 | −        | −                                   | <i>m/z</i> 583.3>407.3>407.3(0.03289V) | Ursocholic               | acid-3- <i>O</i> -              | HLM       |
| M17                        | 9.2  | 583.3 | 407.3 | −54.11 | −100 | −        | −                                   | <i>m/z</i> 583.3>407.3>407.3(0.02803V) | 3β,7β,12α-trihydroxy-5β- | acid-3- <i>O</i> -              | HLM       |
|                            |      |       |       |        |      |          |                                     |                                        | cholan-24-oic            |                                 |           |
| M18                        | 9.22 | 469.3 | 97    | −99.87 | −100 | −        | −                                   | <i>m/z</i> 469.3>389.3>389.3(0.02525V) | 7β-hydroxy-3-oxo-5β-     | acid-7-sulfate                  | HLM       |
|                            |      |       |       |        |      |          |                                     |                                        | cholan-24-oic            |                                 |           |
| M19                        | 8.69 | 471.3 | 97    | −102.5 | −100 | −        | −                                   | <i>m/z</i> 471.3>391.3>391.3(0.02812V) | Ursodeoxycholic          | acid-3-                         | HLM & MLM |
|                            | 6.64 | −     | −     | −      | −    | 471.2427 | 391.2880,96.9605,79.9576            |                                        | sulfate*                 |                                 | HLM       |
| M19- <i>d</i> <sub>4</sub> | 6.62 | 475.3 | 97    | −102.5 | −100 | 475.2677 | 395.3124                            | −                                      | Ursodeoxycholic          | acid- <i>d</i> <sub>4</sub> -3- | HLM & MLM |
| M20                        | 8.92 | 471.3 | 97    | −101.1 | −100 | −        | −                                   | <i>m/z</i> 471.3>389.3>389.3(0.02516V) | Ursodeoxycholic          | acid-7-                         | HLM & MLM |
|                            |      |       |       |        |      |          |                                     |                                        | sulfate                  |                                 |           |
|                            |      |       |       |        |      |          |                                     |                                        | sulfate                  |                                 |           |

Note: “\*” identified by authentic reference. HLM: human liver microsomes; MLM: mouse liver microsomes.
